# Supplementary material for: Affective state determination in a mouse model of colitis-associated colorectal cancer
Source: PLoS One. 2020 Jan 27;15(1):e0228413. doi: 10.1371/journal.pone.0228413 (PMC6984705; doi:10.1371/journal.pone.0228413)
Supplement: S4 Dataset — (XLSX) [file pone.0228413.s004.xlsx]

## Sheet: COMBINED DATA LIVE GRIMACE
Saline + Water + Bup											AOM + DSS + Bup
mouse id	baseline	5	19	26	40	47	61				mouse id	baseline	5	19	26	40	47	61
56	0	0	0	0	0	0	0				69	0	0	0	0	0	0	0
58	0	0	0	0	0	0	0				76	0	0	0	0	0	0	0
59	0	0.111111	0	0	0	0	0				77	0	0	0.222222	0	0	0.111111	0
63	0	0	0	0	0	0	0				85	0	0	0.222222	0	0	0	0
65	0	0	0	0	0	0	0				87	0	0	0.444444	0	0	0	0
72	0	0	0	0	0	0	0				89	0	0	0	0	0	0	0
73	0	0	0	0	0	0	0				99	0	0	0	0	0	0	0
83	0	0.444444	0	0	0	0	0				109	0	0	0.111111	0.444444	0	0.555556	0
96	0	0	0	0	0	0	0				110	0	0	0	0	0	0.111111	0
100	0	0	0	0	0	0	0				GROUP MEAN	0	0	0.111111	0.0493827	0	0.0864198	0
GROUP MEAN	0	0.0555556	0	0	0	0	0				SEM	0	0	0.0523783	0.0493827	0	0.0607954	0
SEM	0	0.0445985	0	0	0	0	0
Saline + Water + Water										AOM + DSS + Water													Real-Time
mouse id	Baseline	5	19	26	40	47	61			mouse id	Baseline	5	19	26	40	47	61					Saline + Water + Water	Saline + Water + Bup	AOM + DSS + Water	AOM + DSS + Bup
8	0	0	0	0	0	0	0			6	0	0	0	0	0	0	0				Baseline	0 ± 0	0 ± 0	0 ± 0	0 ± 0
16	0	0	0	0	0	0	0			21	0	0	0	0	0	0	0				Day 5	0 ± 0	0.056 ± 0.04	0 ± 0	0 ± 0
26	0	0	0	0	0	0	0			35	0	0	0	0	0	0	0				Day 19	0 ± 0	0 ± 0	0.198 ± 0.08	0.111 ± 0.05
32	0	0	0	0	0	0	0			43	0	0	0	0	0	0	0				Day 26	0 ± 0	0 ± 0	0.062 ± 0.03	0.049 ± 0.05
49	0	0	0	0	0	0	0			66	0	0	0.666667	0	0	0.111111	0				Day 40	0 ± 0	0 ± 0	0 ± 0	0 ± 0
61	0	0	0	0	0	0	0			71	0	0	0.333333	0.222222	0	0	0				Day 47	0 ± 0	0 ± 0	0.012 ± 0.012	0.086 ± 0.06
64	0	0	0	0	0	0	0			74	0	0	0.111111	0	0	0	0				Day 61	0 ± 0	0 ± 0	0 ± 0	0 ± 0
75	0	0	0	0	0	0	0			80	0	0	0.444444	0.222222	0	0	0
97	0	0	0	0	0	0	0			84	0	0	0.222222	0.111111	0	0	0
108	0	0	0	0	0	0	0			MEAN	0	0	0.197531	0.0617284	0	0.0123457	0
MEAN	0	0	0	0	0	0	0			SEM	0	0	0.0802469	0.0326636	0	0.0123457	0
SEM	0	0	0	0	0	0	0
